# Supplementary material for: Specific phosphorylation of microtubule-associated protein 2c by extracellular signal–regulated kinase reduces interactions at its Pro-rich regions
Source: PubMed Central journal article supplement — J Biol Chem. 2022 Aug 17;298(10):102384. doi: 10.1016/j.jbc.2022.102384 (PMC9520037; doi:10.1016/j.jbc.2022.102384), 2022-08-17
Supplement: mmc1.pdf [file mmc1.pdf]

Specific phosphorylation of microtubule-associated protein 2c by extracellular signal-regulated kinase reduces interactions at its Pro-rich regions

Jitka Plucarová<sup>1,2</sup>, Séverine Jansen<sup>2</sup>, Subhash Narasimhan<sup>1,2</sup>, Alice Laníková<sup>1,2</sup>, Marc Lewitzky<sup>3</sup>, Stephan M. Feller<sup>3</sup> and Lukáš Žídek<sup>1,2</sup>

From the <sup>1</sup>National Centre for Biomolecular Research, Faculty of Science, Masaryk University, Kamenice 5, CZ-625 00, Brno, Czech Republic, <sup>2</sup>Central European Institute of Technology, Masaryk University, Kamenice 5, CZ-625 00, Brno, Czech Republic, <sup>3</sup>Institute of Molecular Medicine, Martin-Luther-University Halle-Wittenberg, Halle, Germany

Running title: *MAP2c phosphorylation by ERK2*

To whom correspondence should be addressed: Lukáš Žídek, phone: +420 54949 8393, fax: +420 54949 2556, lzidek@chemi.muni.cz

**Keywords:** microtubule-associated protein (MAP), extracellular signal-regulated kinase (ERK), cyclin-dependent kinase (CDK), Src homology 3 domain (SH3 domain), protein kinase A (PKA), nuclear magnetic resonance (NMR), growth factor receptor-bound protein 2 (GRB2)

---

## CONTENTS

- Table S1 Chemical shifts of MAP2c residues phosphorylated by ERK and CDK2
- Table S2 List of primers used
- Figure S1 Microscale Thermophoresis of MAP2c and ERK2
- Figure S2 Initial kinetics of phosphorylation of <sup>15</sup>N-MAP2c by ERK2 and CDK2
- Figure S3 Phosphorylation kinetics by ERK2 of MAP2c after prior phosphorylation by PKA, GSK3 $\beta$  and CDK2
- Figure S4 Phosphorylation kinetics by ERK2 of MAP2c-1–159 and MAP2c-159–255 without D-docking sites
- Figure S5 Phosphorylation of MAP2c by PKA after prior phosphorylation by ERK2
- Figure S6 Microscale Thermophoresis of MAP2c and Fyn-SH3 and Abl-SH3
- Figure S7 Dephosphorylation of MAP2c phosphorylated by ERK in neuroblastoma cell extract
- Figure S8 Phosphorylation of MAP2c-S435D and MAP2c-S140D in neuroblastoma cell extract

## TABLES

**Table S1:**  $^{15}\text{N}/^1\text{H}$  Chemical shifts of phosphorylated serines and threonines in samples of  $^{15}\text{N}$ -MAP2c phosphorylated by ERK2 and CDK2 for 20 hours. For phosphorylated residues clustered in the sequence, phosphorylated neighbor residues that influence the position of the peak are indicated in parenthesis. *np* indicate that the residue is not phosphorylated by the respective kinase. Unassigned peaks are labeled as *nd*.

| Residue        | Unphosphorylated |              | ERK2            |              | CDK2            |              |
|----------------|------------------|--------------|-----------------|--------------|-----------------|--------------|
|                | $^{15}\text{N}$  | $^1\text{H}$ | $^{15}\text{N}$ | $^1\text{H}$ | $^{15}\text{N}$ | $^1\text{H}$ |
| Ser028         | 118.653          | 8.211        | 120.111         | 8.725        | 119.992         | 8.710        |
| Ser136         | 117.533          | 8.328        | 118.810         | 8.712        | 118.719         | 8.700        |
| Ser140         | 117.401          | 8.370        | 118.715         | 8.751        | 118.645         | 8.743        |
| Ser178         | 118.841          | 8.358        | 120.580         | 8.848        | 120.414         | 8.835        |
| Thr235         | 118.495          | 8.212        | 122.909         | 9.142        | 122.912         | 9.147        |
| Thr238         | 118.645          | 8.168        | 120.244         | 8.664        | 120.295         | 8.658        |
| Thr238(Thr235) | -                | -            | nd              | nd           | 119.864         | 8.618        |
| Thr238(Ser241) | -                | -            | 120.975         | 8.724        | np              | np           |
| Ser241         | 115.314          | 8.138        | 117.193         | 8.904        | np              | np           |
| Thr245         | 121.410          | 8.271        | 123.783         | 8.879        | 123.792         | 8.885        |
| Thr248         | 116.811          | 7.989        | 119.565         | 8.893        | 121.157         | 8.995        |
| Thr248(Thr245) | -                | -            | 120.736         | 8.906        | 120.467         | 8.867        |
| Thr256         | 117.782          | 8.187        | 121.816         | 9.087        | 122.012         | 9.143        |
| Thr256(Thr259) | -                | -            | 122.221         | 9.167        | nd              | nd           |
| Thr259         | 115.836          | 7.981        | 119.373         | 8.709        | 119.158         | 8.662        |
| Thr259(Thr256) | -                | -            | 118.781         | 8.651        | nd              | nd           |
| Thr259(Thr262) | -                | -            | nd              | nd           | 118.679         | 8.617        |
| Thr262         | 115.836          | 7.981        | 119.384         | 8.696        | 119.186         | 8.694        |
| Thr262(Ser264) | -                | -            | np              | np           | 119.086         | 8.642        |
| Ser264         | 115.321          | 8.194        | np              | np           | 117.712         | 8.854        |
| Thr268         | 117.686          | 8.207        | 121.177         | 9.066        | 121.855         | 9.102        |
| Thr268(Thr271) | -                | -            | nd              | nd           | 121.186         | 9.074        |
| Thr271         | 116.372          | 8.031        | 119.795         | 8.932        | nd              | nd           |
| Thr271(Thr268) | -                | -            | nd              | nd           | 119.268         | 8.802        |
| Thr271(Ser274) | -                | -            | 120.365         | 8.907        | -               | -            |
| Ser274         | 116.219          | 8.223        | 117.829         | 8.790        | np              | np           |
| Thr289         | 118.651          | 8.205        | 121.489         | 9.043        | nd              | nd           |
| Ser293         | 118.674          | 8.342        | 120.827         | 8.867        | -               | -            |
| Ser293(Thr289) | -                | -            | 120.262         | 8.785        | 120.175         | 8.779        |
| Thr296         | 116.028          | 8.122        | 119.152         | 8.905        | nd              | nd           |
| Thr296(Ser293) | -                | -            | 119.656         | 8.967        | 118.586         | 8.826        |
| Ser422         | 118.671          | 8.393        | 119.702         | 8.710        | 119.615         | 8.697        |
| Ser430         | 116.592          | 8.210        | 117.582         | 8.533        | 117.470         | 8.508        |
| Ser448         | 117.567          | 8.213        | 119.421         | 8.726        | np              | np           |

**Table S2:** Primers used to produce the MAP2c phosphorylation mutants, and for cloning of Fyn-SH3

| Mutated site | primers                                                                                                |
|--------------|--------------------------------------------------------------------------------------------------------|
| S28D         | acccccacgaccagagatgaaggaccagggaggctcagggg<br>atctctgggtcgtgggggtgtgcagctgcctctgtgagtgagg               |
| S136D        | ctgccacctgaccaccaccatgccagcatcagaacaac<br>tggtgggtgggtcaggtggcagattaactgtttctcagctgc                   |
| S140D        | caccaccagaccagcatcagaacaacagctgcactggaagaagcaacaag<br>tgatgctgggtcgtgggtgggaaggtggcagattaactgtttctcagc |
| S178D        | ataaccaaggaccagaaaaacgttcttccctccaagacctcc<br>ttttctgggtccttggttattccatcagtgactttgtccttgc              |
| T238E        | acacctactgagcctggatctactgcaatcacccctggcactcc<br>agatccaggctcagtaggtgttgaggtgccgcttttctgctctg           |
| T245E        | ctgcaatcagcctggcactcctcaagctactttcacgtacccag<br>gtgccaggctcattgtagtagatccagggtagtaggtgtgaggtgc         |
| T259E        | cccaggcagcctggaaccccgactatcccaggacaccaggaac<br>gtccaggctcgcctgggttacgtgaagagtagcttgaggagtgcc           |
| T262E        | acccctggagaaccgactatcccaggacaccagg<br>atagctcgggttctccaggggtcctgggttacgtga ag                          |
| S264D        | gaaccccgactatcccaggacaccaggaaccccc aaa tct gg<br>ctgggatagtcgggggtccaggggtgcctgggg                     |
| T268E        | tatcccagggaaccaggaacccccaaatctggcatcttggtgccag<br>ggttctggttccctgggatagctcgggttccaggggtgc              |
| T271E        | acaccaggagaacccaaatctggcatcttggtgccagtgagaag<br>agatttgggttctcctggtgtcctgggatagctcgggttccag            |
| S274D        | ccccaaagatggcatcttggtgccagtgagaagaaagtgccatcttgc<br>aagatgccatcttgggggtcctggtgtcctgggatagctcggg        |
| T289E        | atattcgcgaacctcaaagtccccagctactccaagcag<br>ctttggaggttcgcgaatgatggcaacttcttctactgggcac                 |
| S293A        | ctcaaaggccccagctactccaagcagcttcggctcattaaccaac<br>gtagctggggcctttggaggagtgcgaatgctggcaactttctctc       |
| S422D        | atcacacaggaccaagcaggtcaagcgtggcgtctccccgg<br>cctgctgggtcctgtgtgatgatcagccccgtggtcgacgcg                |
| Fyn-SH3      | actccatggaacactcttggccctttatg<br>gcgggatcctcaaactggagccacataattgctg                                    |

FIGURES

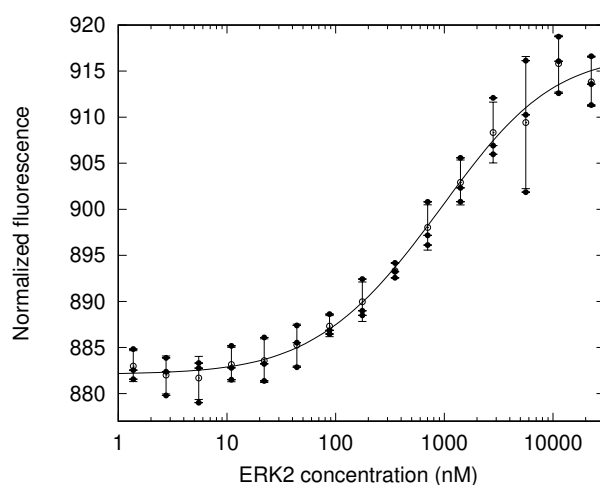

**Figure S1:** Microscale thermophoretic analysis of the interaction between MAP2c and ERK2. The concentration of MAP2c was 5 nM and ERK2 concentration ranged from 1.3 nM ERK2 to 45  $\mu$ M. The dissociation constant is  $(0.8 \pm 0.4) \mu$ M

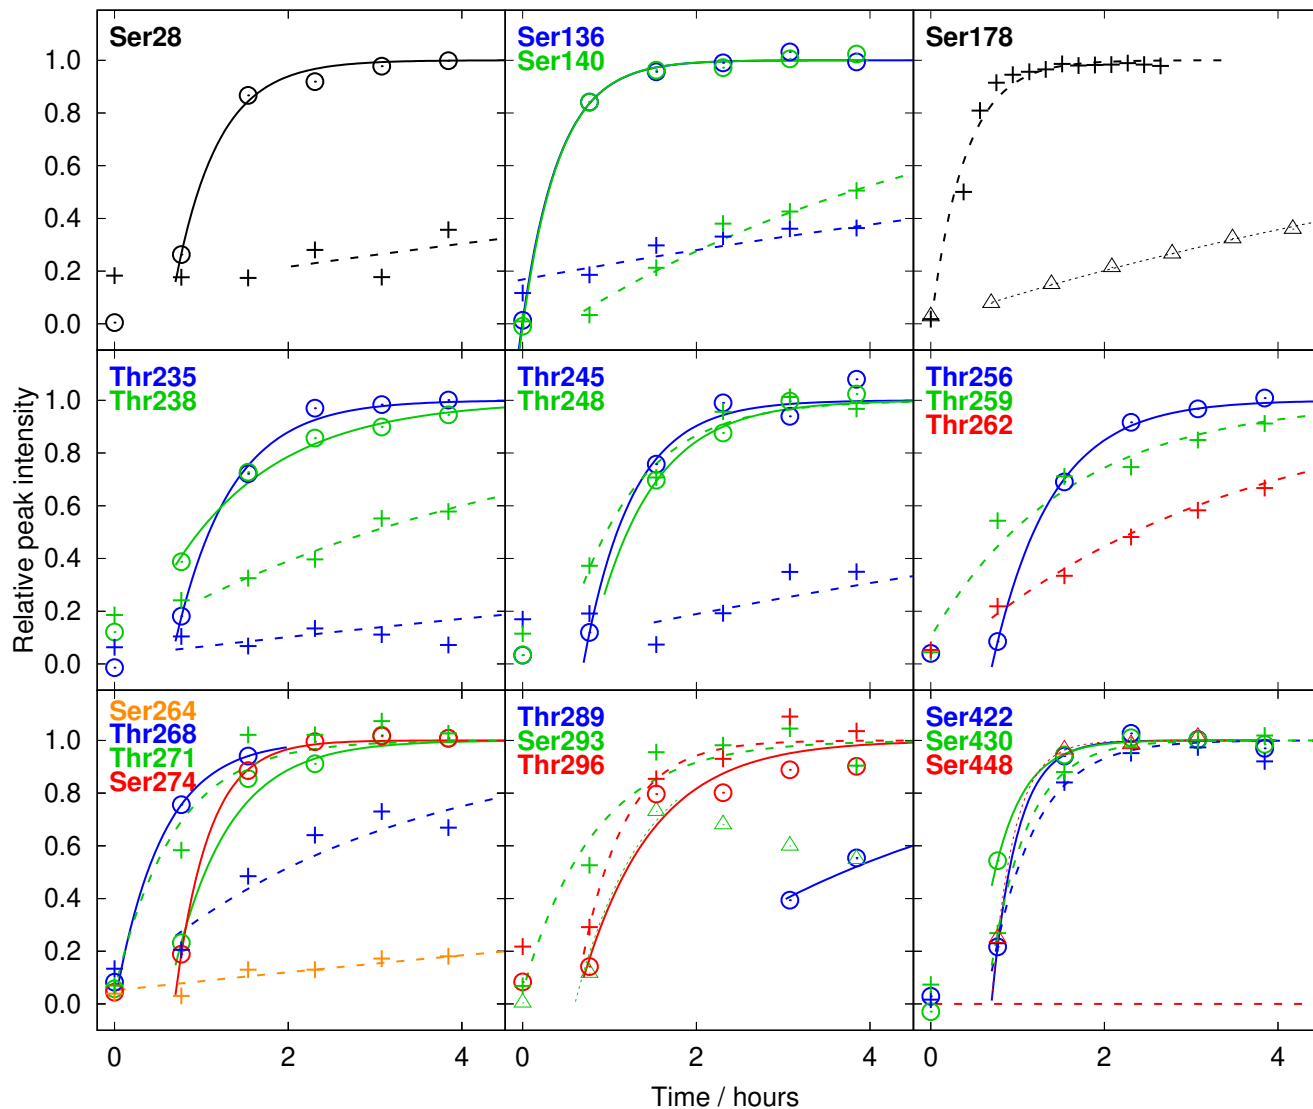

**Figure S2:** Initial kinetics of phosphorylation of  $^{15}\text{N}$ -MAP2c by ERK2 (circles and solid curves) and CDK2 (crosses and dashed lines). Kinetics of phosphorylation of Ser178, Ser293 and Ser448 by ERK2 was determined using MAP2c fragments 1–159, 250–347 and 300–467, respectively (triangles and dashed lines). Note that only two peak heights were used to determine  $\tau_{1/2}$  of Ser293 in MAP2c-250–347 because the slowly growing peak height of phosphorylated Ser293 in the vicinity of phosphorylated Thr296 was not measured due to the complexity of the spectra.

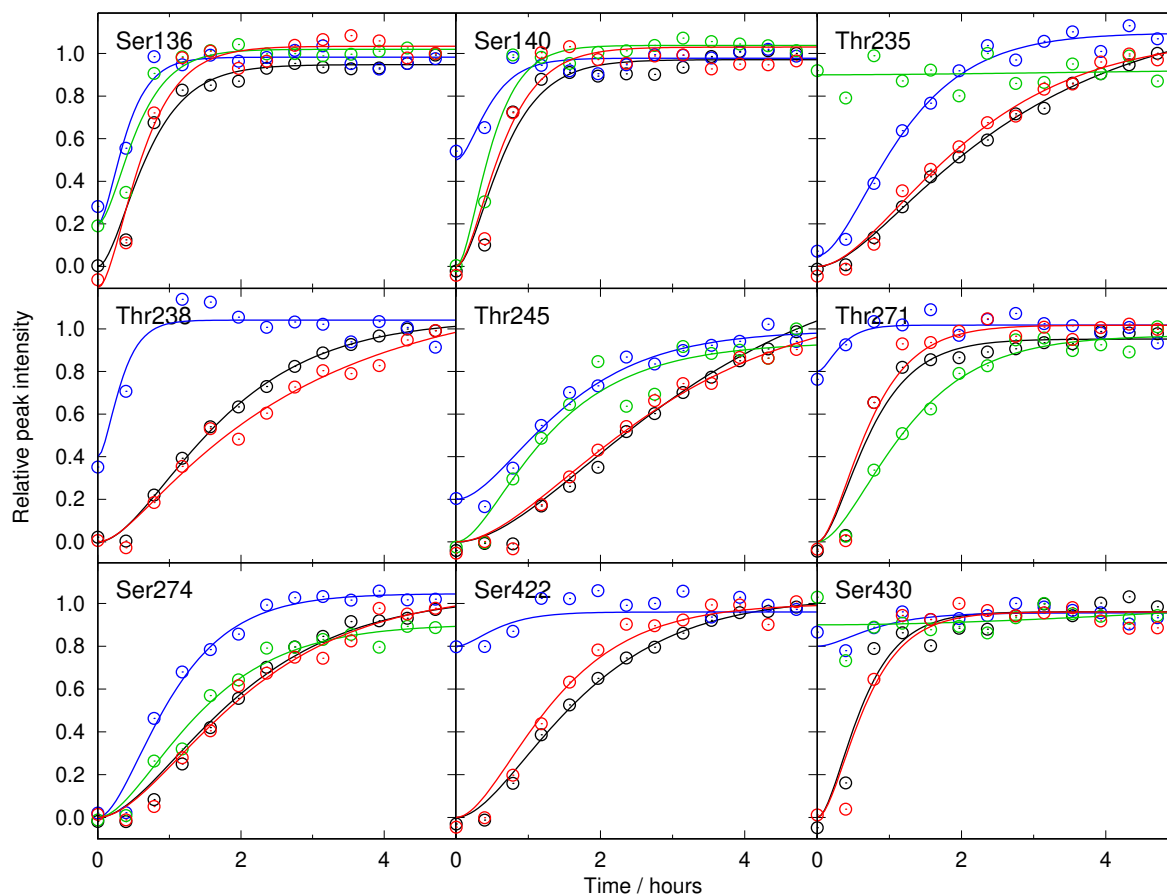

**Figure S3:** Kinetics of phosphorylation of well-resolved peaks of MAP2c residues by ERK2 with prior priming by CDK2 (blue), GSK3 $\beta$  (green) and PKA (red). Phosphorylation kinetics of unprimed MAP2c are shown in black. Ser136, Thr235, and Ser430 are phosphorylated by GSK3 $\beta$  and CDK2, while Ser140, Thr238, Thr245 and Thr271 are phosphorylated by CDK2. Therefore, peaks of phosphorylated forms of these residues are present already at the beginning of phosphorylation by ERK2. Upon phosphorylation by GSK3 $\beta$ , Thr238 and Ser422 are not resolved in  $^1\text{H}, ^{15}\text{N}$ -SOFAST-HMQC. Prior phosphorylation by PKA does not have any effect on the kinetics of phosphorylation by ERK2, while prior phosphorylation by CDK2 moderately increase the rate of ERK2 phosphorylation of Thr235, Thr238, Thr245, and Ser274, and prior phosphorylation by GSK3 $\beta$  moderately increases the rate of phosphorylation of Thr245.

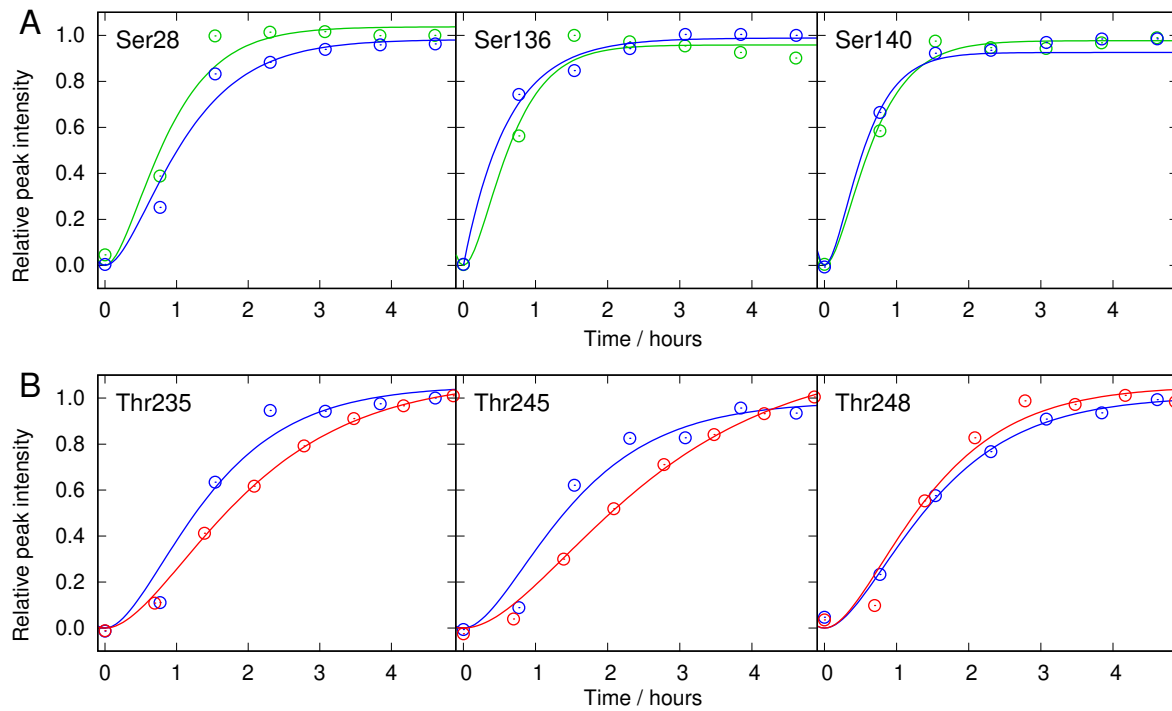

**Figure S4:** Comparison of the kinetics of phosphorylation by ERK2 of  $^{15}\text{N}$ -MAP2c-1–159 (A, green) and  $^{15}\text{N}$ -159–254 (B, red), lacking the D-box docking sites, with that of full-length  $^{15}\text{N}$ -MAP2c (blue). Phosphorylation rates of the different residues in absence of the D-boxes are similar to the wild-type MAP2c, indicating that the D-boxes do not influence phosphorylation kinetics significantly.

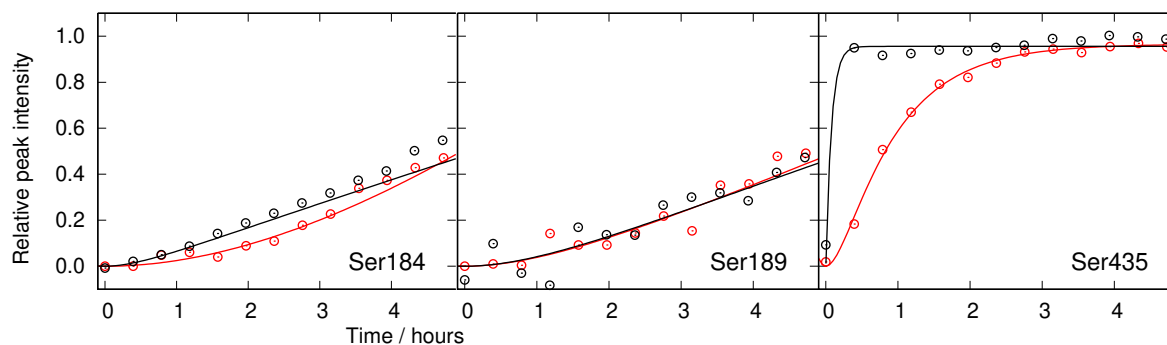

**Figure S5:** Kinetics of phosphorylation of the main PKA phosphorylation sites (Ser184, Ser189 and Ser435) in  $^{15}\text{N}$ -MAP2c by PKA with prior priming by ERK2 (red), compared to unprimed  $^{15}\text{N}$ -MAP2c (black). Thr220 was not resolved in the  $^1\text{H}$ ,  $^{15}\text{N}$ -HSQC spectrum of MAP2c phosphorylated by ERK2. Upon phosphorylation by ERK2, phosphorylation of Ser435 is slower ( $\tau_{1/2} = (0.85 \pm 0.08)$  hrs, when MAP2c phosphorylated by ERK2,  $\tau_{1/2} = 0.07$  hours in unprimed MAP2c). Phosphorylation of Ser184 is less affected ( $\tau_{1/2} = 4.1 \pm 0.8$  hrs and  $\tau_{1/2} = (2.6 \pm 0.1)$  hrs for primed and unprimed MAP2c, respectively), while Ser189 phosphorylation is not affected.



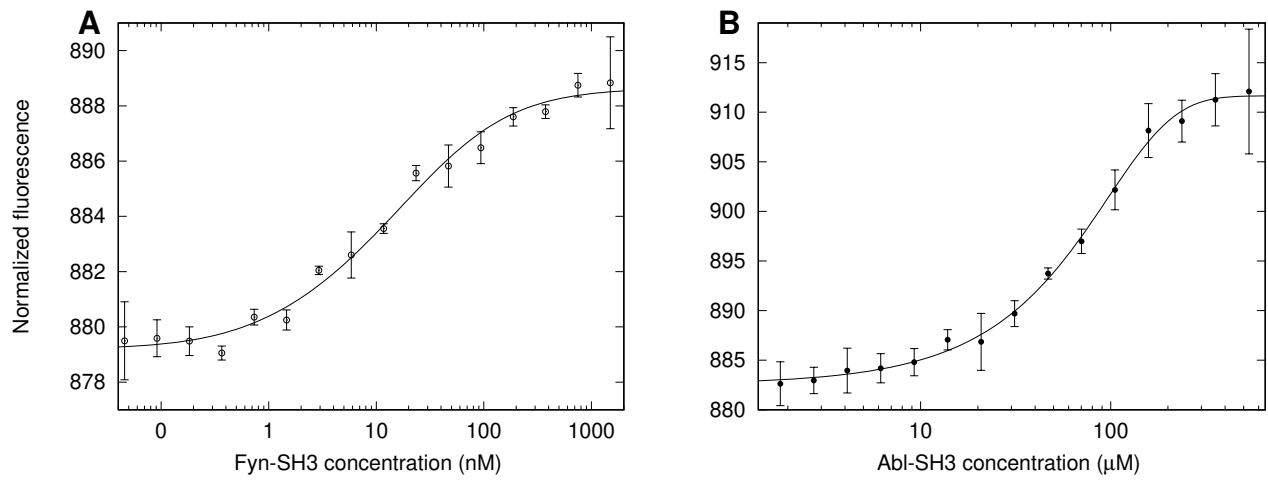

**Figure S6:** Microscale thermophoresis analysis of the interactions of 5 nM MAP2c with (A) 0.046 nM to 1.5  $\mu$ M Fyn-SH3 and (B) 1.8  $\mu$ M to 533  $\mu$ M Abl-SH3. The dissociation constants are  $(22 \pm 5)$  nM and  $(68 \pm 10)$   $\mu$ M for Fyn-SH3 and Abl-SH3, respectively.

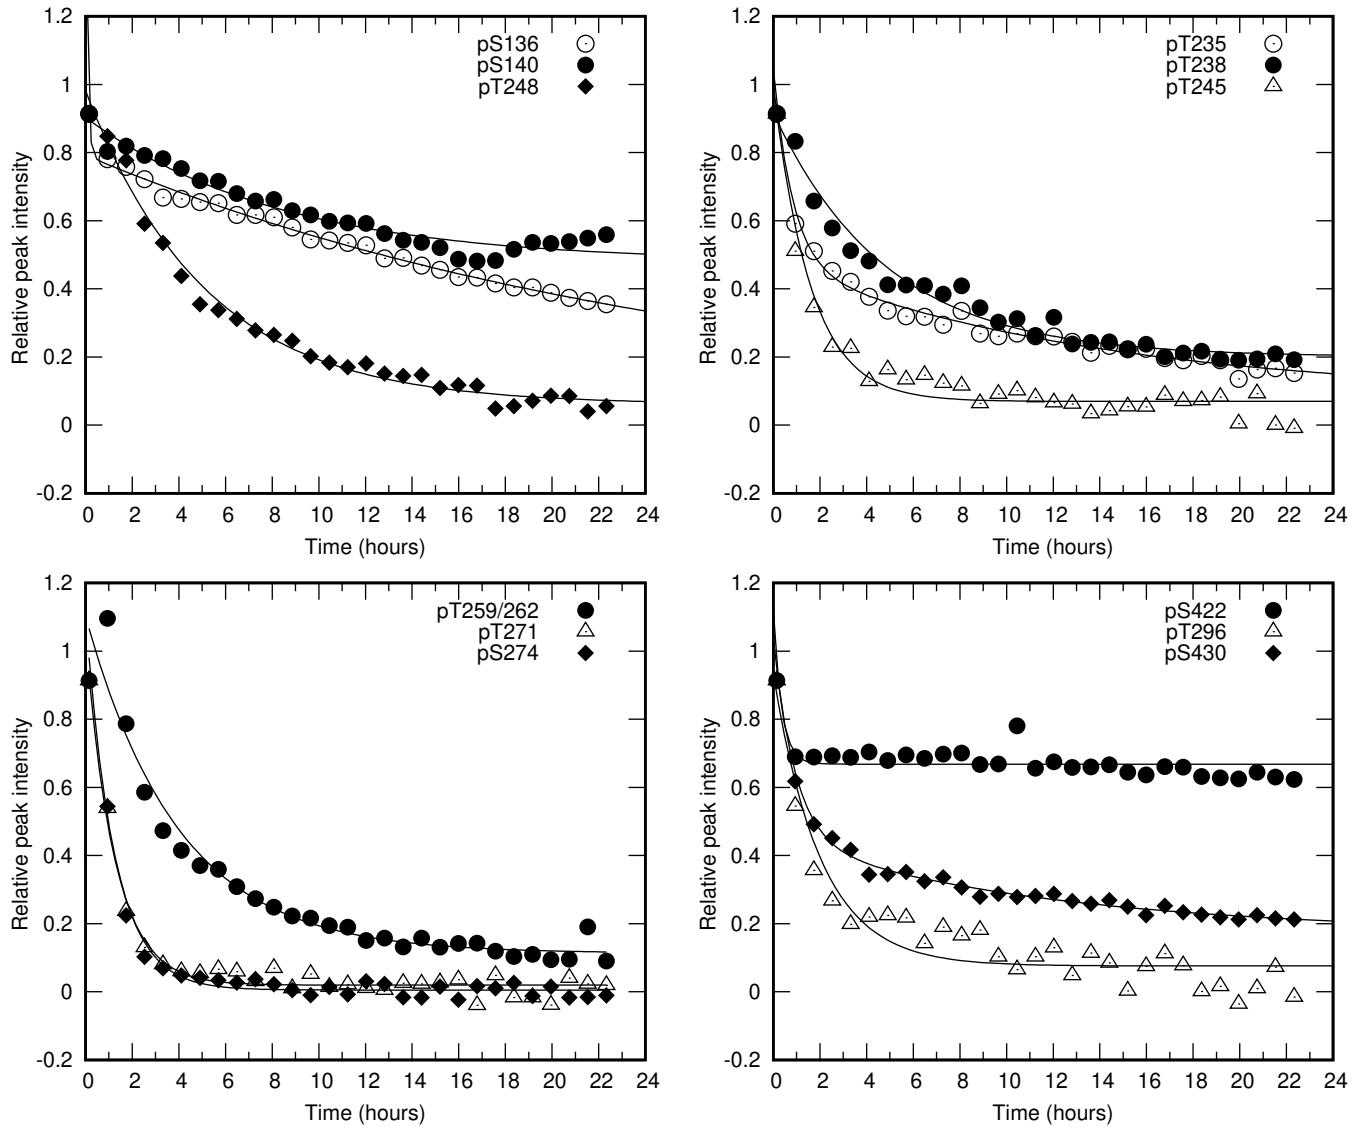

**Figure S7:** Decrease of the intensities of well resolved serines and threonines of  $^{15}\text{N}$ -MAP2c phosphorylated by ERK2 in SH-SY5Y neuroblastoma cell extract.

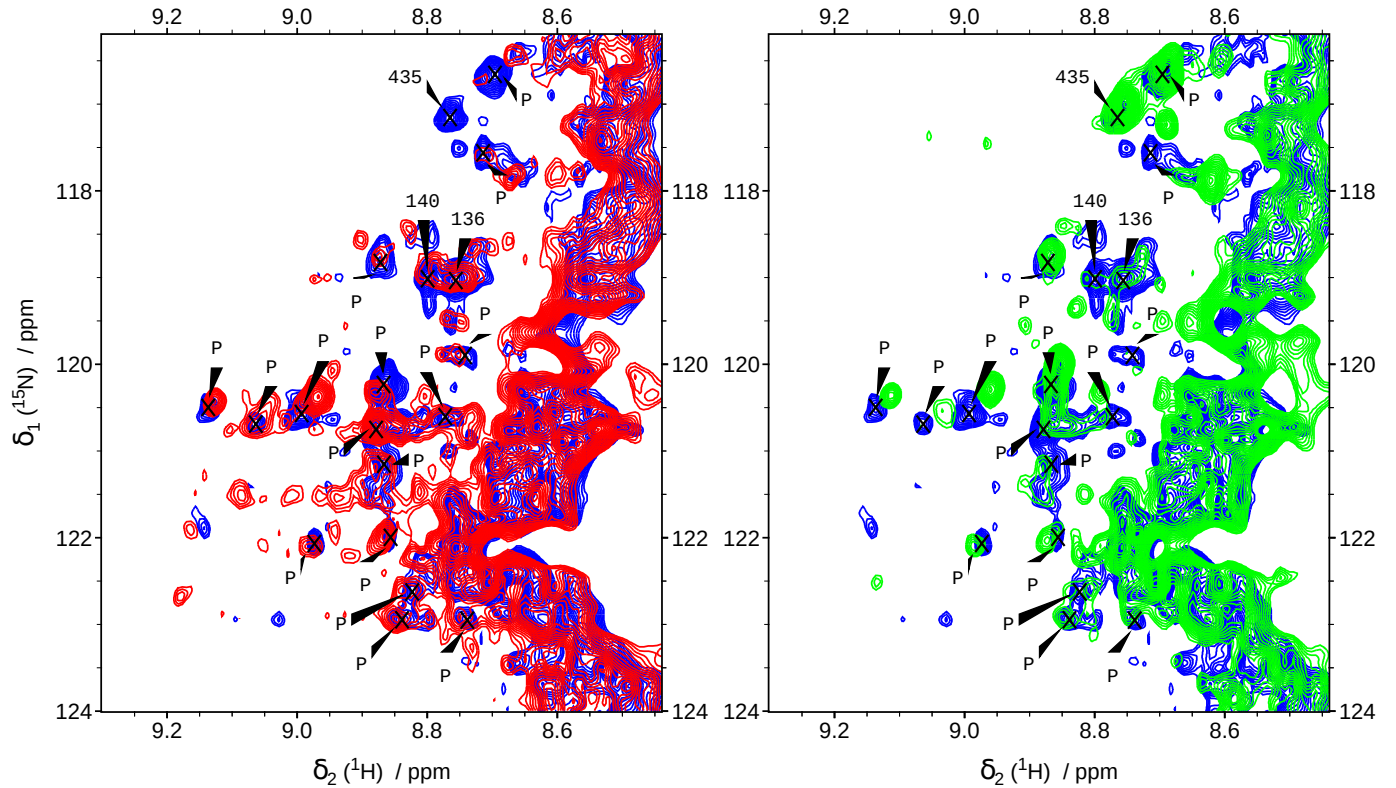

**Figure S8:** Overlaid  $^1\text{H},^{15}\text{N}$ -SOFAST-HMQC spectra of  $^{15}\text{N}$ -MAP2c-S435D (red),  $^{15}\text{N}$ -MAP2c-S140D (green), and  $^{15}\text{N}$ -MAP2c wild type (blue, presented separately in Figure 6) phosphorylated in SH-SY5Y neuroblastoma cell extract. Peaks of phosphorylated Ser435 and Ser140 are present in the spectra of wild-type MAP2c (blue, in both panels) but missing in spectra of the corresponding mutants (the peak of Ser435 is missing in the spectrum of the S435D, shown in red in the left panel and the peak of Ser140 is missing in the spectrum of the S140D, shown in green in the right panel).
